# Supplementary material for: A simple and cost-effective extractive desulfurization process with novel deep eutectic solvents
Source: Royal Society of Chemistry journal article supplement (doi:10.1039/c5ra27266a), 2016-01-01
Supplement: c5ra27266a1.pdf [file c5ra27266a1.pdf]

## **A simple and cost effective extractive desulfurization process novel deep eutectic solvents**

Xin Wang <sup>a</sup>, Wei Jiang <sup>b</sup>, Wenshuai Zhu <sup>\*a</sup>, Hongping Li <sup>a</sup>, ShengYin <sup>a</sup>, Yonghui

Chang <sup>a,c</sup>, Huaming Li <sup>\*b</sup>

*<sup>a</sup>School of Chemistry and Chemical Engineering, Jiangsu University, Zhenjiang*

*212013, P. R. China*

*<sup>b</sup>Institute for Energy Research, Jiangsu University, 301 Xuefu Road, Zhenjiang*

*212013, P. R. China*

*<sup>c</sup>School of Chemistry and Chemical Engineering, Hainan Normal University, Haikou*

*571158, P. R. China*

*\*Corresponding author: Tel.:+86-511-88791800; Fax: +86-511-88791708; E-mail  
address: [zhuws@ujs.edu.cn](mailto:zhuws@ujs.edu.cn); [lihm@ujs.edu.cn](mailto:lihm@ujs.edu.cn)*

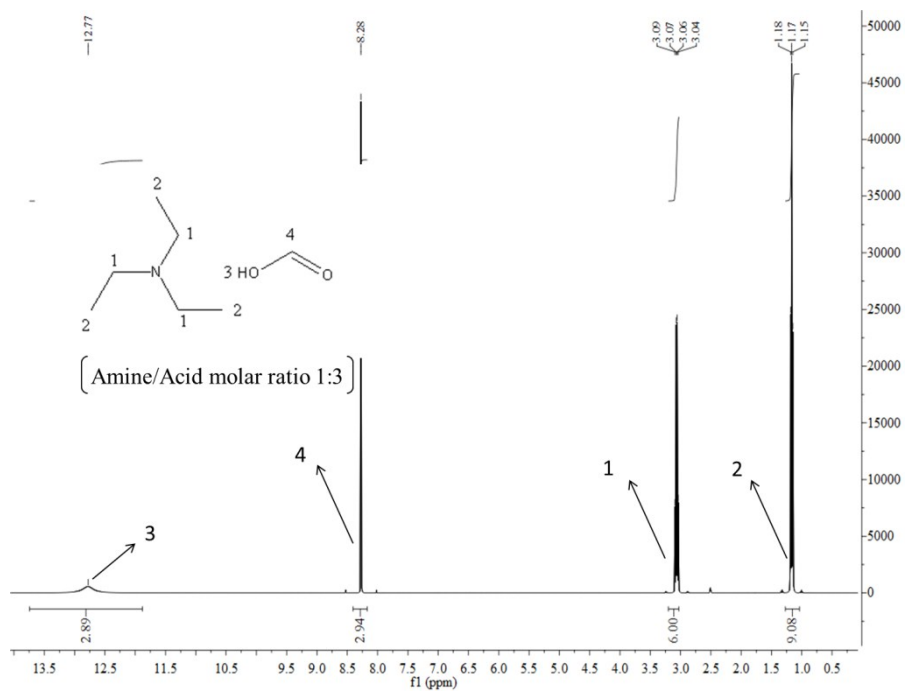

Figure S1.  $^1\text{H}$  NMR of [TEtA][Fo]

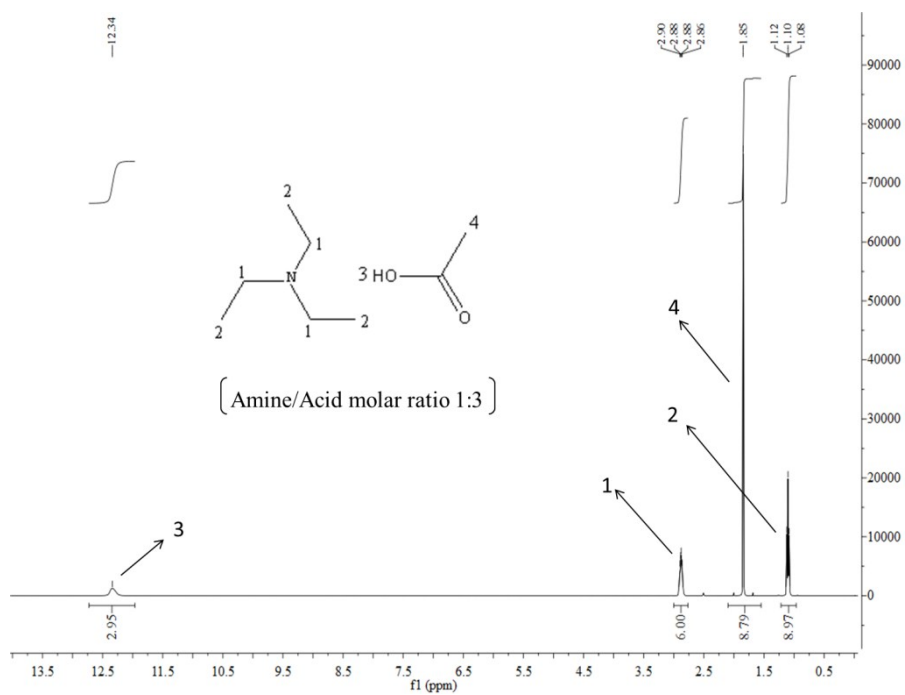

Figure S2.  $^1\text{H}$  NMR of [TEtA][Ac]

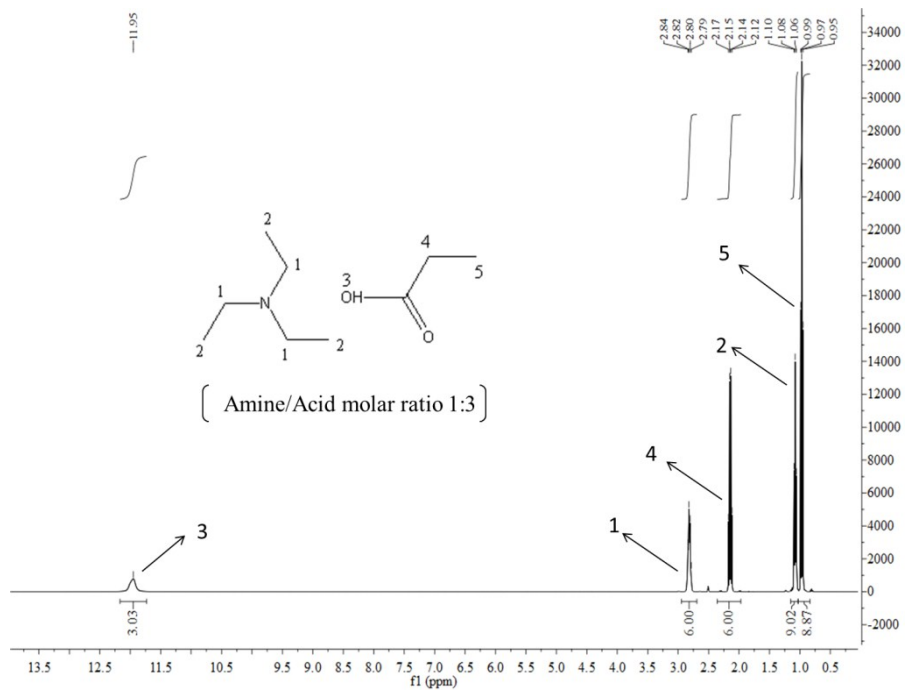

**Figure S3. <sup>1</sup>H NMR of [TEtA][Pr]**

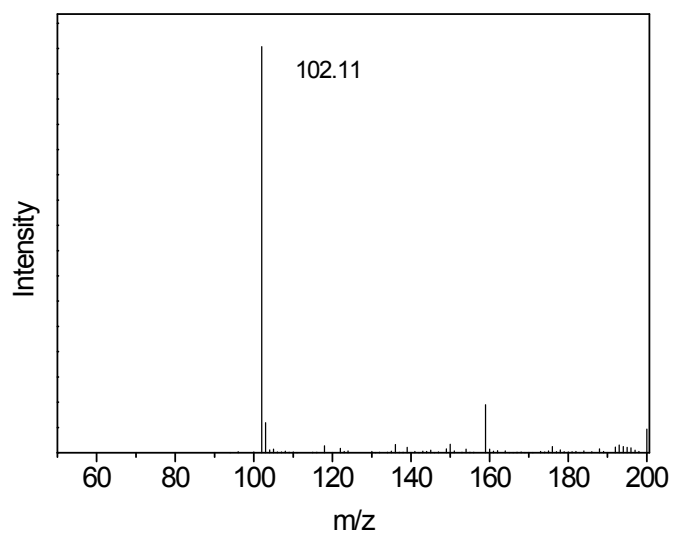

**Figure S4. Positive ESI-MS of [TEtA][Fo]**

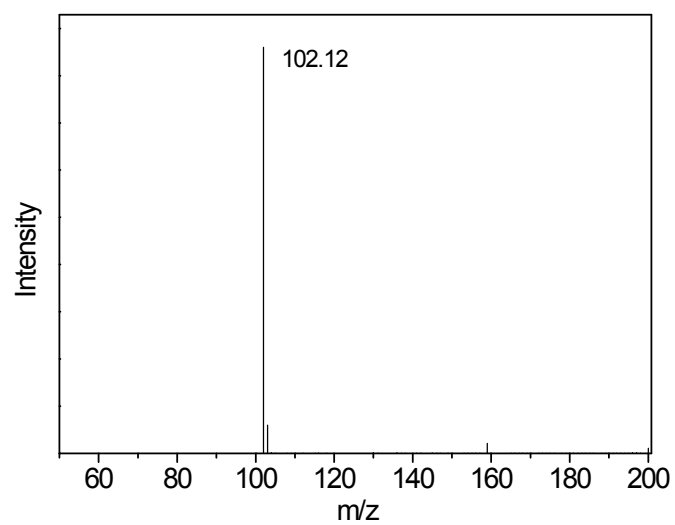

**Figure S5. Positive ESI-MS of [TEtA][Ac]**

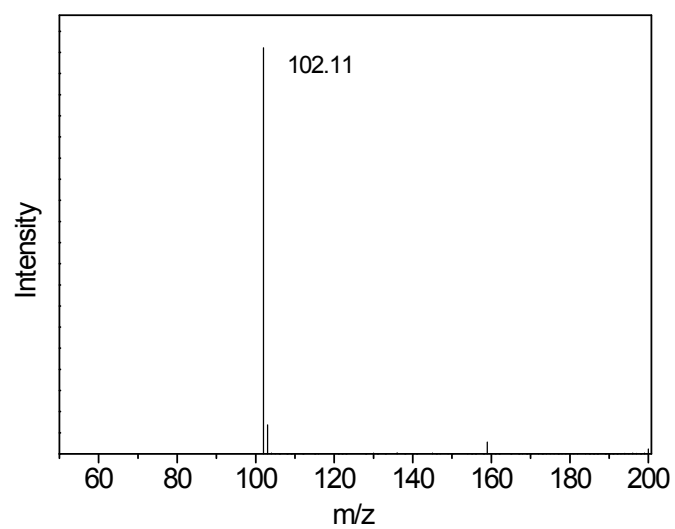

**Figure S6. Positive ESI-MS of [TEtA][Pr]**

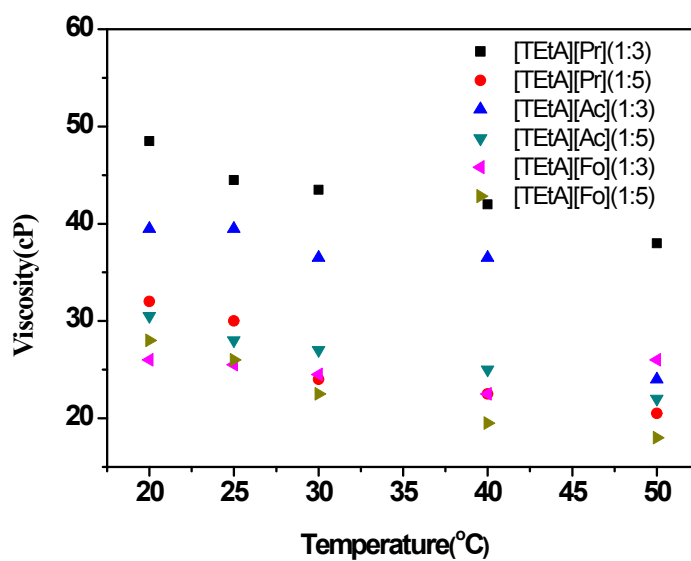

Figure S7. The viscosities of the DESs

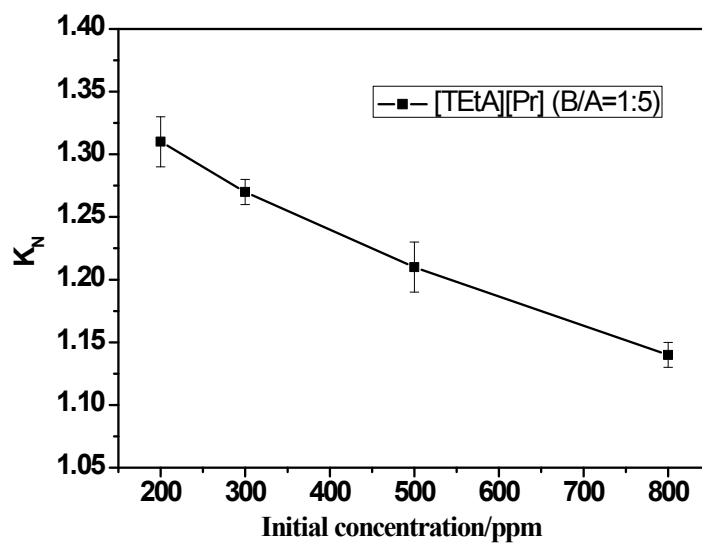

Figure S8. Effect of the initial sulfur concentration on sulfur removal.

Experimental conditions: DES= 1.75 g, model oil= 5 mL, T= 30°C, t= 10 min.

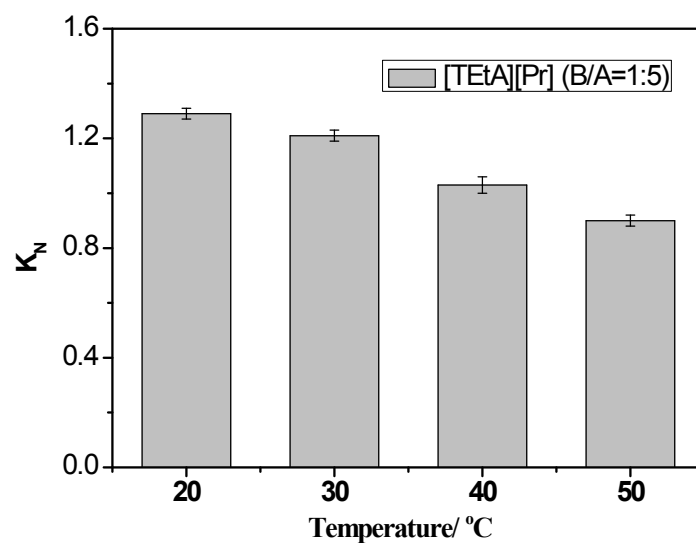

**Figure S9. Effect of temperature on sulfur removal.** Experimental conditions:

DES= 1.75 g, model oil (DBT)= 5 mL,  $t= 10$  min.

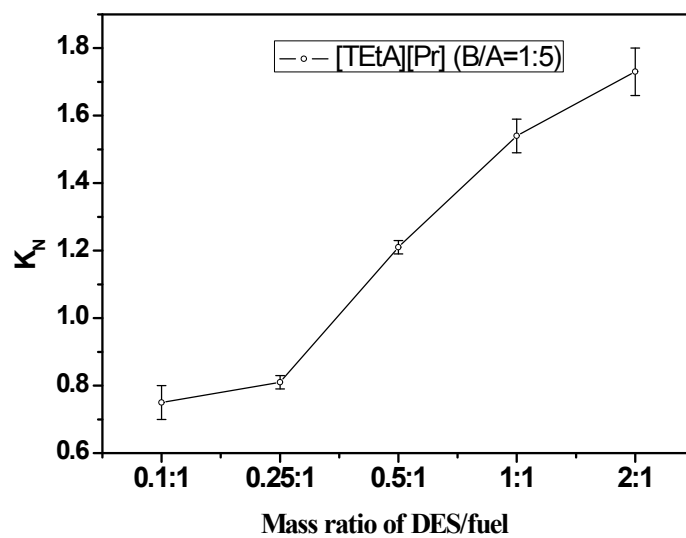

**Figure S10. Effect of the amount of DES on sulfur removal.**

Experimental conditions: model oil (DBT)= 5 mL,  $T= 30^\circ\text{C}$ ,  $t= 10$  min.

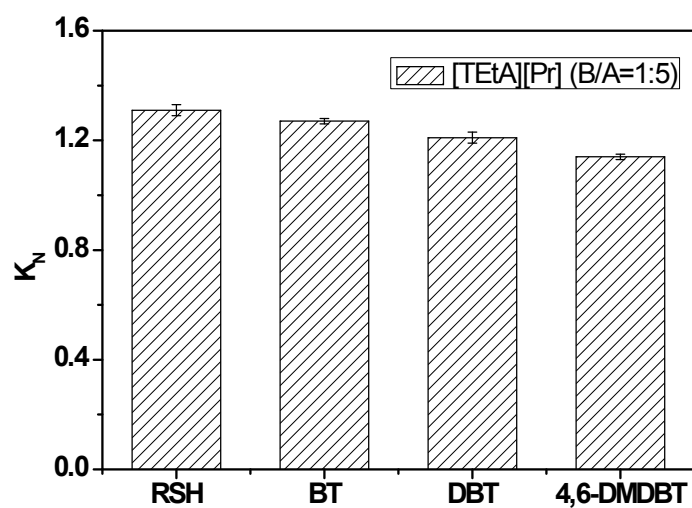

**Figure S11. Investigation of different sulfur compounds.**

Experimental conditions: DES= 1.75 g, model oil= 5 mL, T= 30°C, t= 10 min.
